# Supplementary material for: Functional and Proteomic Investigations Reveal Major Royal Jelly Protein 1 Associated with Anti-hypertension Activity in Mouse Vascular Smooth Muscle Cells
Source: PubMed Central journal article supplement (PMC4957218; doi:10.1038/srep30230), 2016-07-22
Supplement: srep30230-s1.pdf [file srep30230-s1.pdf]

# **Functional and Proteomic Investigations Reveal Major Royal Jelly Protein 1 Associated with Anti-hypertension Activity in Mouse Vascular Smooth Muscle Cells**

Pei Fan<sup>1,2,§</sup>, Bin Han<sup>1,§</sup>, Mao Feng<sup>1</sup>, Yu Fang<sup>1</sup>, Lan Zhang<sup>2</sup>, Han Hu<sup>1</sup>, Yue Hao<sup>1</sup>, Yuping Qi<sup>1</sup>, Xiaozhen Zhang<sup>2</sup>, Jianke Li<sup>1,\*</sup>:

§These authors contributed equally to this work

\* Corresponding author

1. Institute of Apicultural Research/Key Laboratory of Pollinating Insect Biology, Ministry of Agriculture, Chinese Academy of Agricultural Sciences, Beijing 100093, China

2. College of Biological Engineering, Henan University of Technology, Zhengzhou 450001, China

## Supplemental Figures

**Fig.S1 EGFP expression shows the successful lentiviral transduction for mouse VSMCs. (a).** is the mode chart of lentiviral vector harboring *mrjp1* gene. **(b).** is the EGFP expression observed in both control and MRJP1 expressing VSMCs after lentiviral transduction.

**Fig.S2 Primers for PCR amplification and real time RT-PCR analysis. (a).** shows the forward and reversed primers for PCR amplification of *mrjp1*. **(b).** displays the forward and reversed primers for real time RT-PCR analysis of *mrjp1* RNA.

**Fig.S3 Immunofluorescent analysis shows reduced  $\alpha$ SMA expression by MRJP1 in VSMCs.** Immunofluorescent analysis of  $\alpha$  SMA expression between control and MRJP1 expressed VSMCs. The expression level is shown as  $\alpha$  SMA /DAPI from three independent experiments (n=3, mean  $\pm$ S.D.) and \* indicates  $p < 0.05$ .

**Fig.S4 Differentially expressed proteins visualized in the enriched pathway of RNA transport.** Green labeled boxes represent the proteins annotated in the significantly enriched pathway of RNA transport. Highlighted pink boxes indicate the differentially expressed proteins mapped into the pathway.

**Fig.S5 Differentially expressed proteins visualized in the enriched pathway of Spliceosome.** Proteins in green labeled boxes are the proteins involved in the significantly enriched pathway of Spliceosome. Proteins in highlighted pink boxes are the differentially expressed ones mapped into the pathway.

**Fig.S6 Differentially expressed proteins visualized in the enriched pathway of Citrate cycle.** Green labeled boxes represent the protein references annotated in the significantly enriched pathway of Citrate cycle. The highlighted pink boxes are the entries of differentially expressed proteins mapped into the pathway.

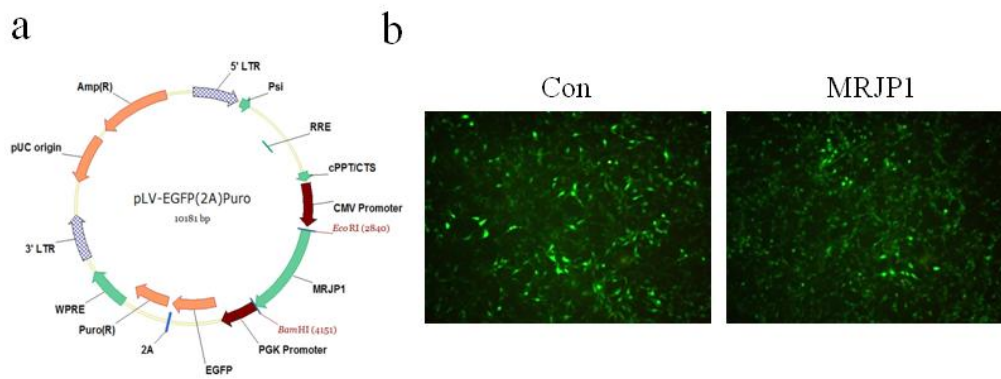

Fig.S1

**a**

**Primers for PCR amplification**

MRJP1-F: ATGACAAGATTGTTTATGCTGG  
 MRJP1-R: TTACAAATGGATTGAAATTTTG

**b**

**Primers for Real time RT-PCR analysis**

MRJP1-F: GTCCTGTAGCTTCCACCAGT  
 MRJP1-R: ATCCGAAGAAGAGAACGCCA  
 GFP F1: TATGGAGTGCAATGCTTCGC  
 GFP R1: TACTCCAGCTTGTGTCCCAG

Fig.S2

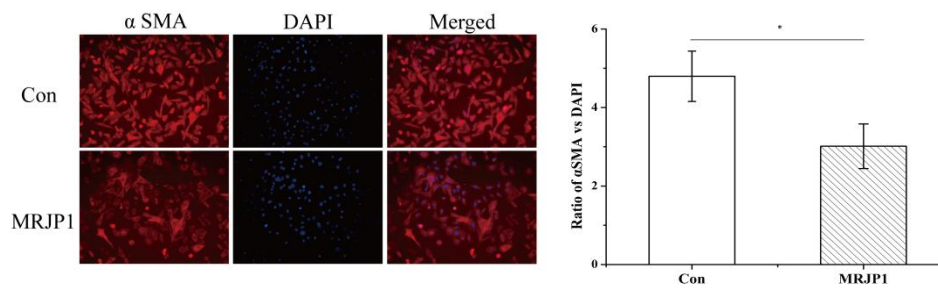

Fig.S3

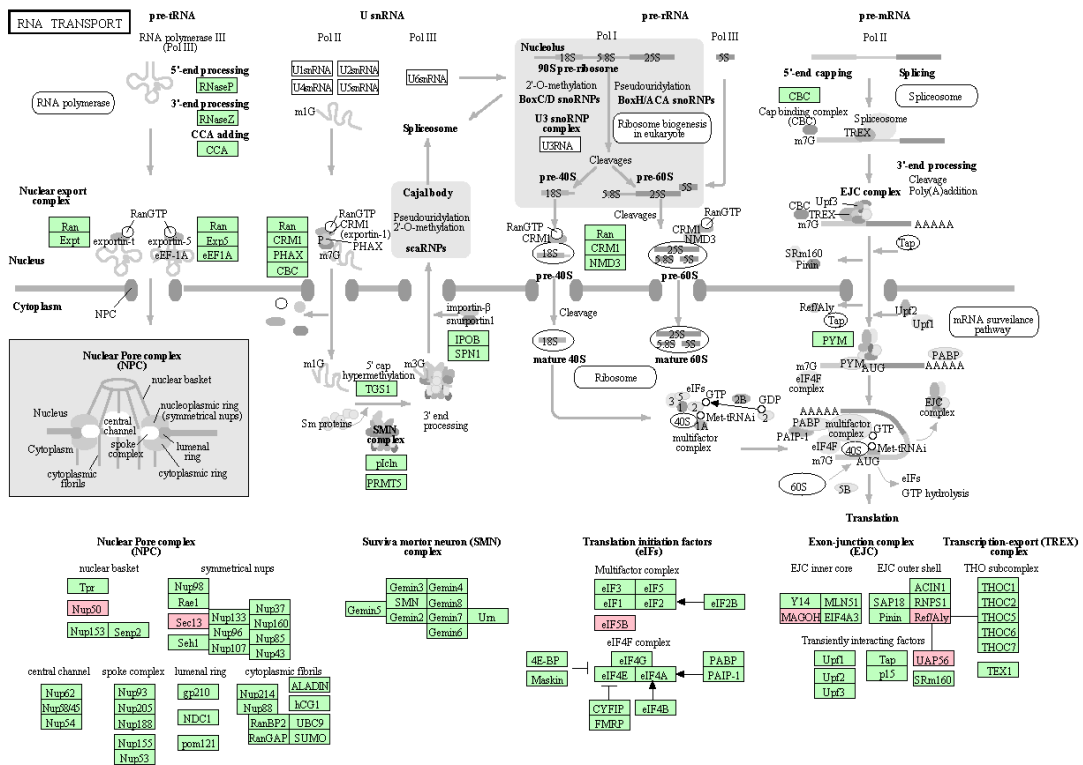

03013 10/17/14  
(c) Kanehisa Laboratories

Fig.S4

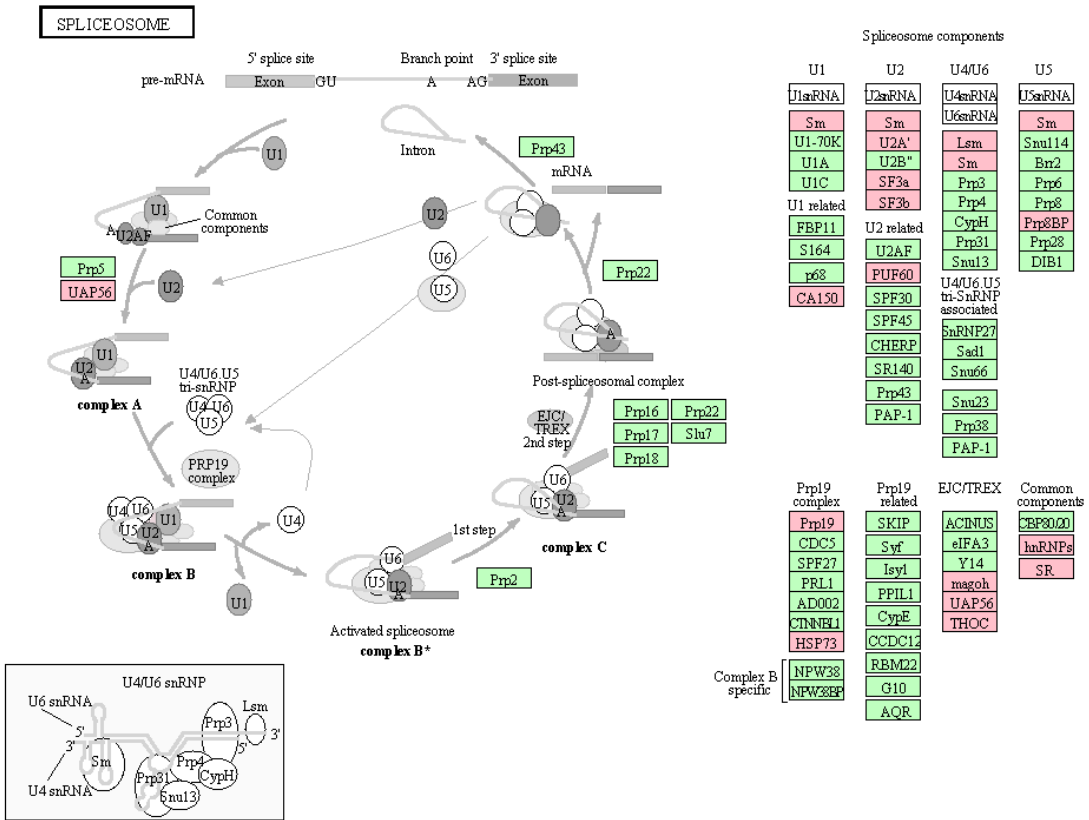

03040 10/6/15  
(c) Kanehisa Laboratories

Fig.S5

CITRATE CYCLE (TCA CYCLE)

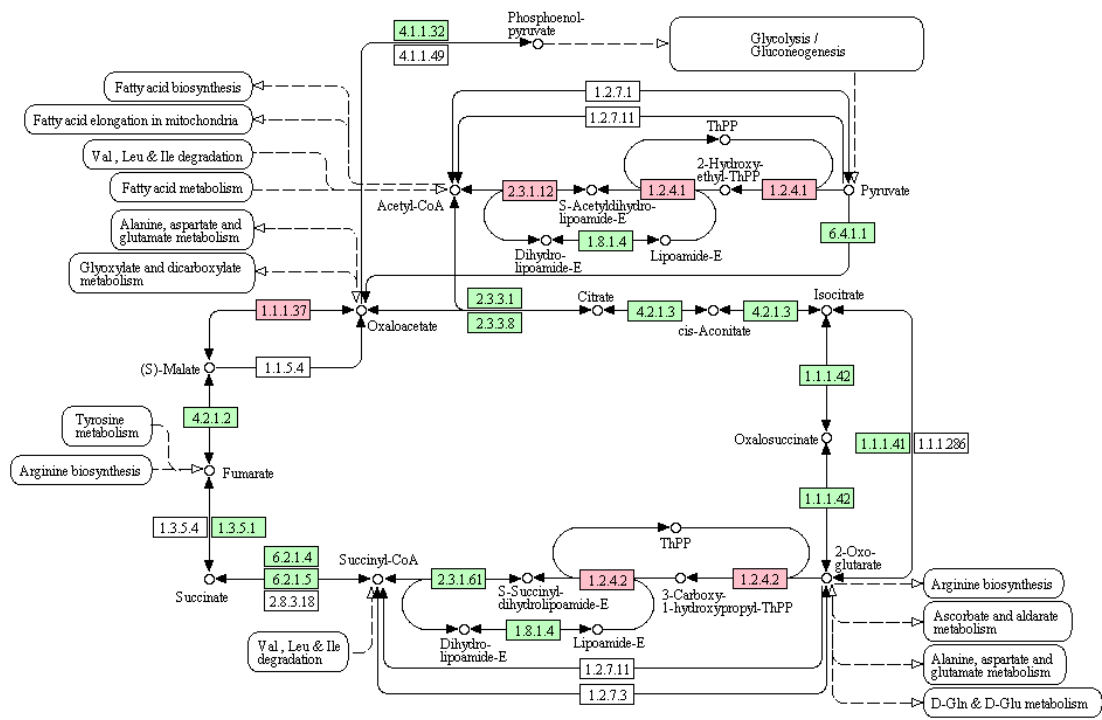

00020 11/26/15  
(c) Kanehisa Laboratories

Fig.S6
